- Ishii T, Takahashi H, Mori S, Nishibori M, Kuroda K, Akira S, Miyake K, Yoshimura A: Peroxiredoxin family proteins are key initiators of post-ischemic inflammation in the brain. *Nat Med* 2012; 18:911–7
24. Szmydynger-Chodobska J, Strazielle N, Gandy JR, Keefe TH, Zink BJ, Gherzi-Egea JF, Chodobski A: Posttraumatic invasion of monocytes across the blood-cerebrospinal fluid barrier. *J Cereb Blood Flow Metab* 2012; 32:93–104
25. Jiang Y, Salafranca MN, Adhikari S, Xia Y, Feng L, Sonntag MK, deFiebre CM, Pennell NA, Streit WJ, Harrison JK: Chemokine receptor expression in cultured glia and rat experimental allergic encephalomyelitis. *J Neuroimmunol* 1998; 86:1–12
26. Cartier L, Hartley O, Dubois-Dauphin M, Krause KH: Chemokine receptors in the central nervous system: Role in brain inflammation and neurodegenerative diseases. *Brain Res Brain Res Rev* 2005; 48:16–42
27. Ubogu EE, Cossoy MB, Ransohoff RM: The expression and function of chemokines involved in CNS inflammation. *Trends Pharmacol Sci* 2006; 27:48–55
28. D'Mello C, Le T, Swain MG: Cerebral microglia recruit monocytes into the brain in response to tumor necrosis factor alpha signaling during peripheral organ inflammation. *J Neurosci* 2009; 29:2089–102
29. Yang Y, Rosenberg GA: Blood-brain barrier breakdown in acute and chronic cerebrovascular disease. *Stroke* 2011; 42:3323–8
30. Blyth BJ, Farhavar A, Gee C, Hawthorn B, He H, Nayak A, Stöcklein V, Bazarian JJ: Validation of serum markers for blood-brain barrier disruption in traumatic brain injury. *J Neurotrauma* 2009; 26:1497–507
31. Ren WJ, Liu Y, Zhou LJ, Li W, Zhong Y, Pang RP, Xin WJ, Wei XH, Wang J, Zhu HQ, Wu CY, Qin ZH, Liu G, Liu XG: Peripheral nerve injury leads to working memory deficits and dysfunction of the hippocampus by upregulation of TNF- $\alpha$  in rodents. *Neuropsychopharmacology* 2011; 36:979–92
32. Pickering M, O'Connor JJ: Pro-inflammatory cytokines and their effects in the dentate gyrus. *Prog Brain Res* 2007; 163:339–54
33. Wan Y, Xu J, Ma D, Zeng Y, Cibelli M, Maze M: Postoperative impairment of cognitive function in rats: A possible role for cytokine-mediated inflammation in the hippocampus. *ANESTHESIOLOGY* 2007; 106:436–43
34. Dehghani F, Conrad A, Kohl A, Korf HW, Hailer NP: Clodronate inhibits the secretion of proinflammatory cytokines and NO by isolated microglial cells and reduces the number of proliferating glial cells in excitotoxically injured organotypic hippocampal slice cultures. *Exp Neurol* 2004; 189:241–51
35. van Rooijen N, Hendrikx E: Liposomes for specific depletion of macrophages from organs and tissues. *Methods Mol Biol* 2010; 605:189–203

## ANESTHESIOLOGY REFLECTIONS FROM THE WOOD LIBRARY-MUSEUM

### Liebig Explodes Heppenheim's Apothecary Shop ... or Did He?

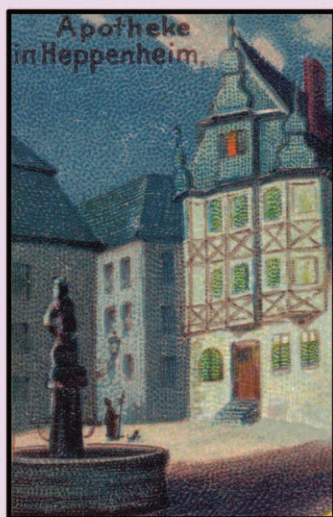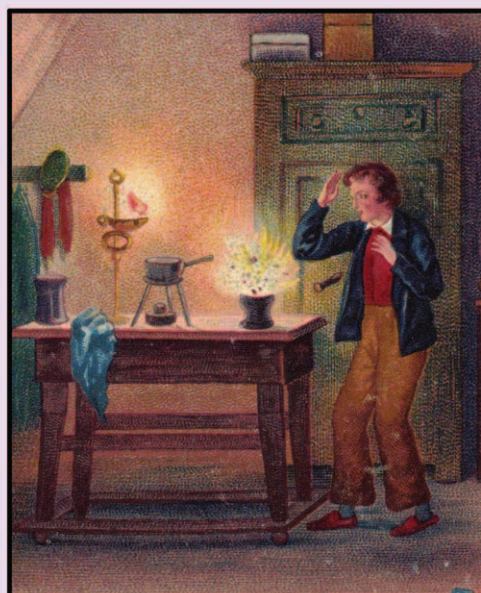

After his chemical tinkering exploded, schoolboy Justus Liebig (1803–1873) was expelled from his hometown's "gymnasium" in Darmstadt, Germany. Relocating 19 miles south from 1819–20, Justus apprenticed in an apothecary shop (left) run by Gottfried Pirsch of Heppenheim. Growing bored with his apothecary mentor, Justus resumed his previous experiments with unstable chemicals. His pharmacy apprenticeship terminated abruptly, after only 10 months, due to a violent explosion (right) and/or his family's inability to keep paying Pirsch. The mischievous young Liebig would grow up to become a founder of organic chemistry and a codiscoverer of chloroform. (Copyright © the American Society of Anesthesiologists, Inc.)

George S. Bause, M.D., M.P.H., Honorary Curator, ASA's Wood Library-Museum of Anesthesiology, Park Ridge, Illinois, and Clinical Associate Professor, Case Western Reserve University, Cleveland, Ohio. UJYC@aol.com.
